# Supplementary material for: Evaluation of Comparative Surveillance Strategies of Circulating Tumor DNA, Imaging, and Carcinoembryonic Antigen Levels in Patients With Resected Colorectal Cancer
Source: PubMed Central journal article supplement (PMC8905389; doi:10.1001/jamanetworkopen.2022.1093), 2022-03-08
Supplement: jamanetwopen-e221093-s001.pdf [file jamanetwopen-e221093-s001.pdf]

## Supplementary Online Content

Fakih M, Sandhu J, Wang C, et al. Evaluation of comparative surveillance strategies of circulating tumor DNA, imaging, and carcinoembryonic antigen levels in patients with resected colorectal cancer. *JAMA Netw Open*. 2022;5(3):e221093.  
doi:10.1001/jamanetworkopen.2022.1093

**eFigure 1.** Study Flow Diagram

**eFigure 2.** Images From Patients With Lung Recurrence With Negative ctDNA Findings

**eFigure 3.** Images From Patients With Persistent ctDNA Positivity and With Delayed Radiographic Disease Recurrence

**eTable.** Sensitivity, Specificity, PPV, and NPV for ctDNA, Imaging, and CEA Levels

This supplementary material has been provided by the authors to give readers additional information about their work.

**eFigure 1. Study Flow Diagram**

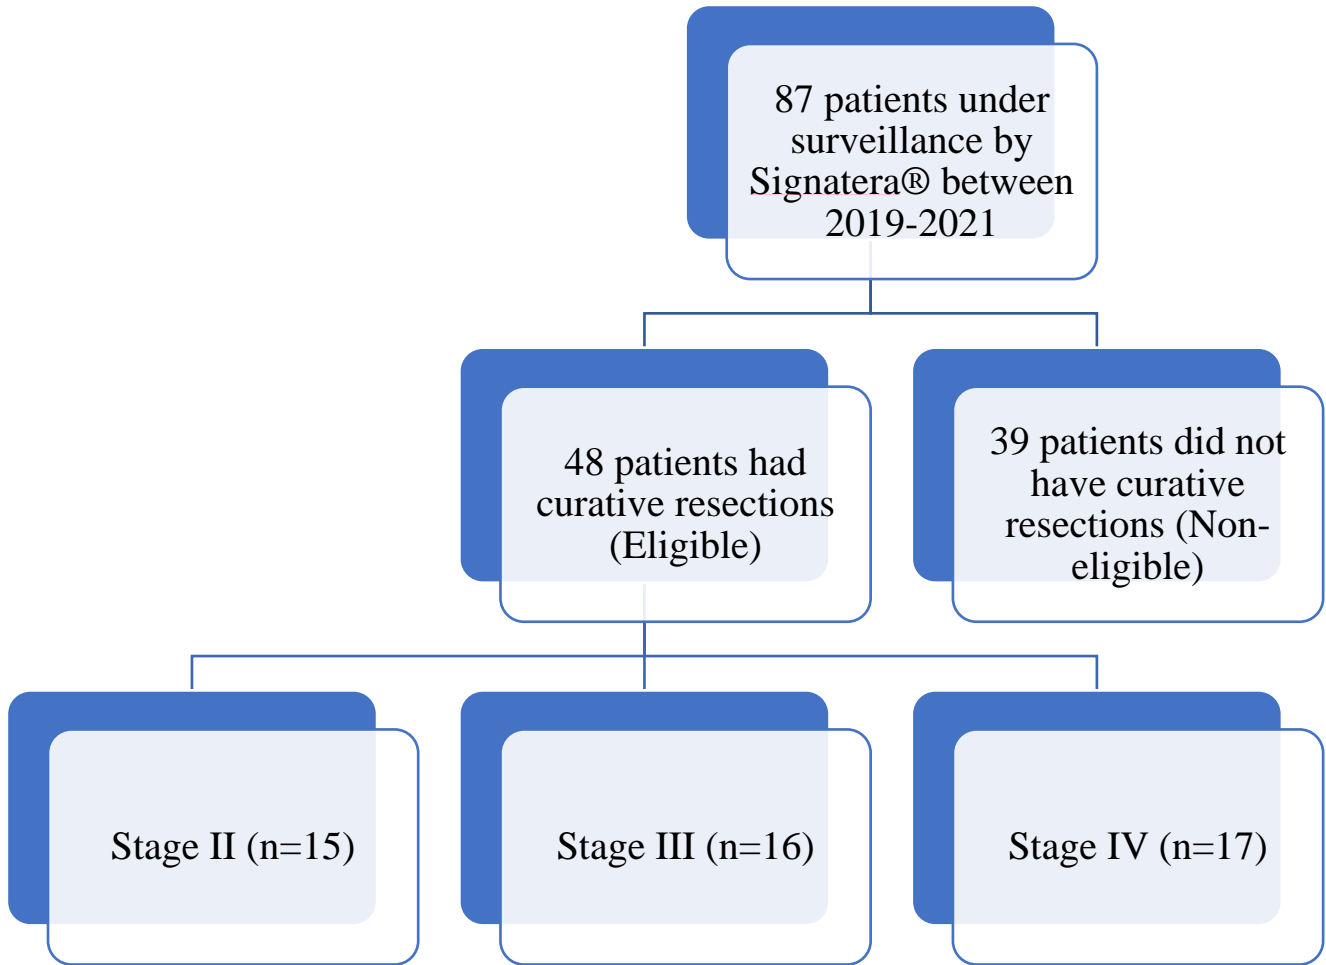

**eFigure 2. Images From Patients With Lung Recurrence With Negative ctDNA Findings**

Case 1: A medial left upper lobe lesion that was subsequently resected confirming metastatic colorectal cancer

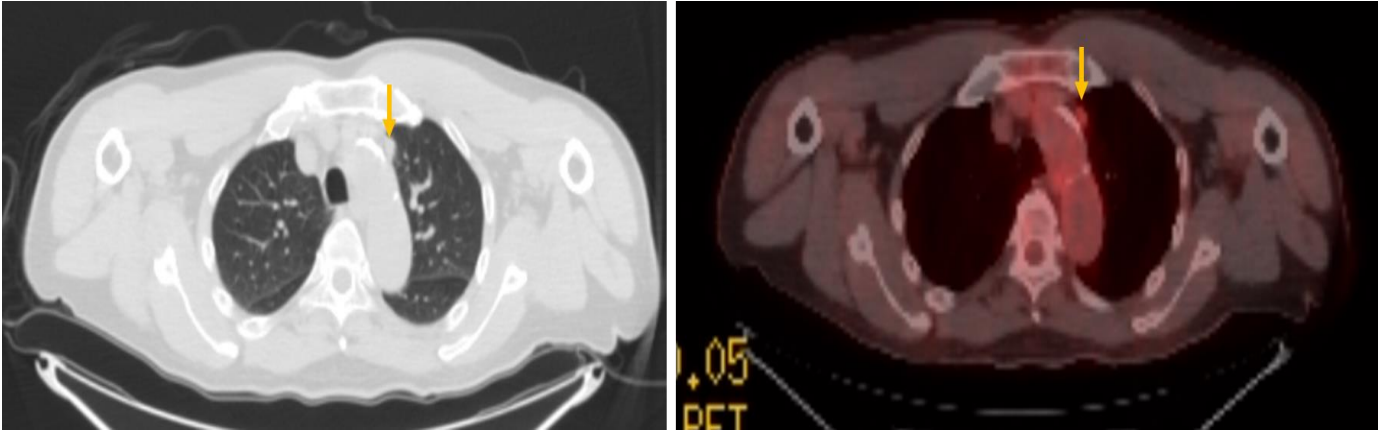

Case 2: Multiple lung nodules that one of which (included in image) was subsequently resected confirming metastatic colorectal cancer

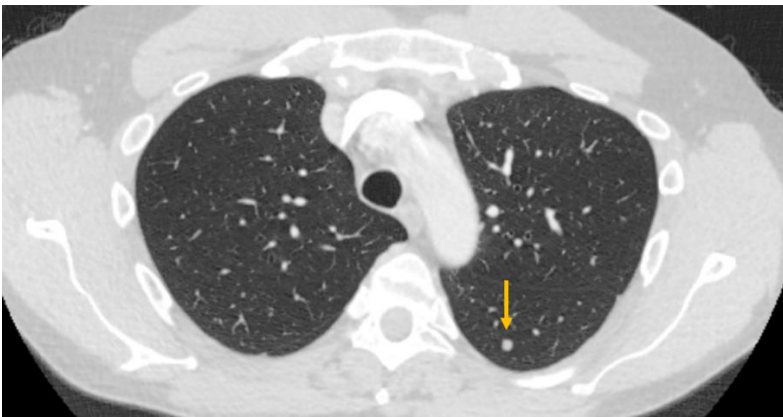

Case 3: Multiple lung nodules associated with a rise in CEA and subsequently resolved with chemotherapy

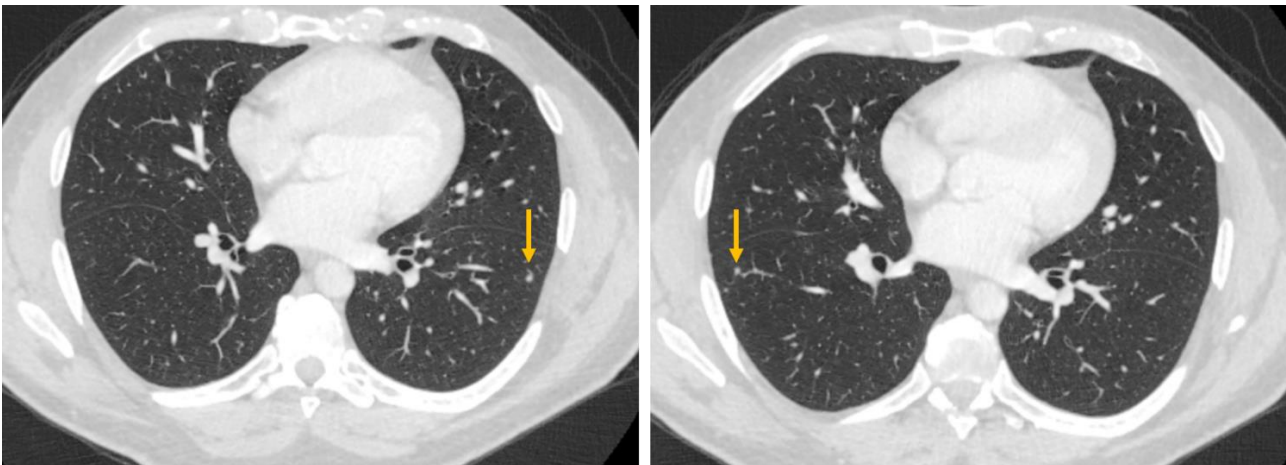

Case 4: Enlarging left lower lobe nodule over a period of 4 months. The lesion was treated with curative intent with stereotactic body radiation therapy

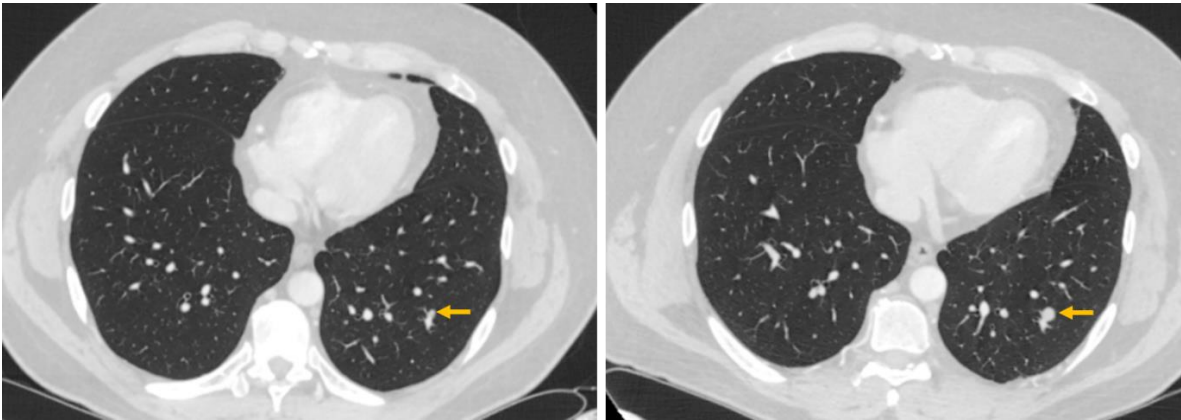

Case 5: Enlarging pleural base right upper lobe nodule over a period of 4 months. Resection confirmed metastatic colorectal cancer

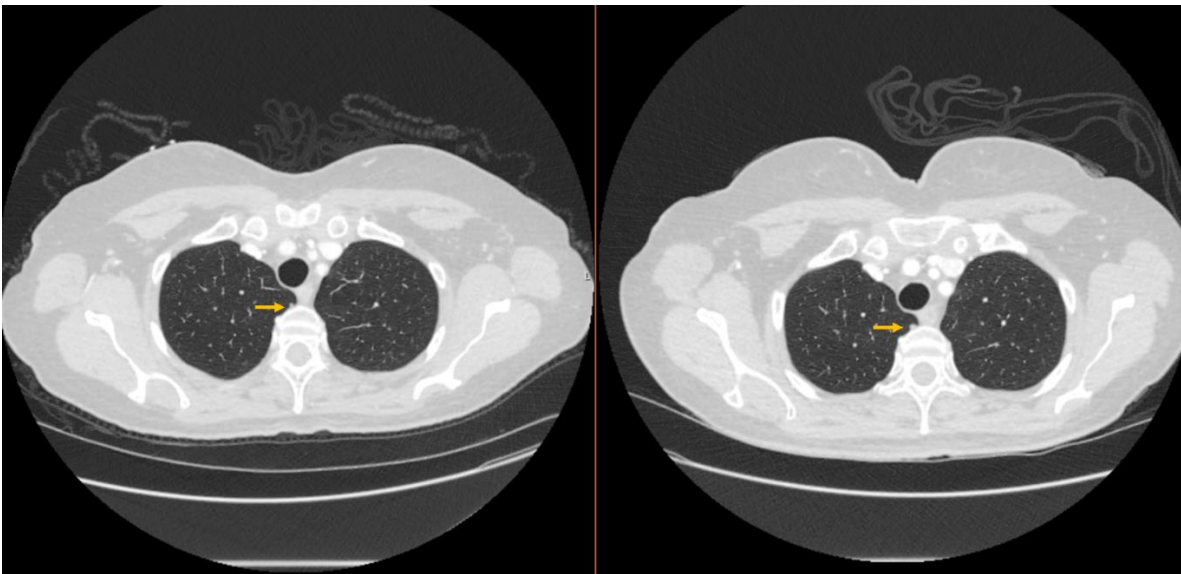

**eFigure 3. Images From Patients With Persistent ctDNA Positivity and With Delayed Radiographic Disease Recurrence**

Case 1: Increase in one of several retroperitoneal lymph nodes (blue arrow) confirmed on CT (right) compared to 6 months prior (left)

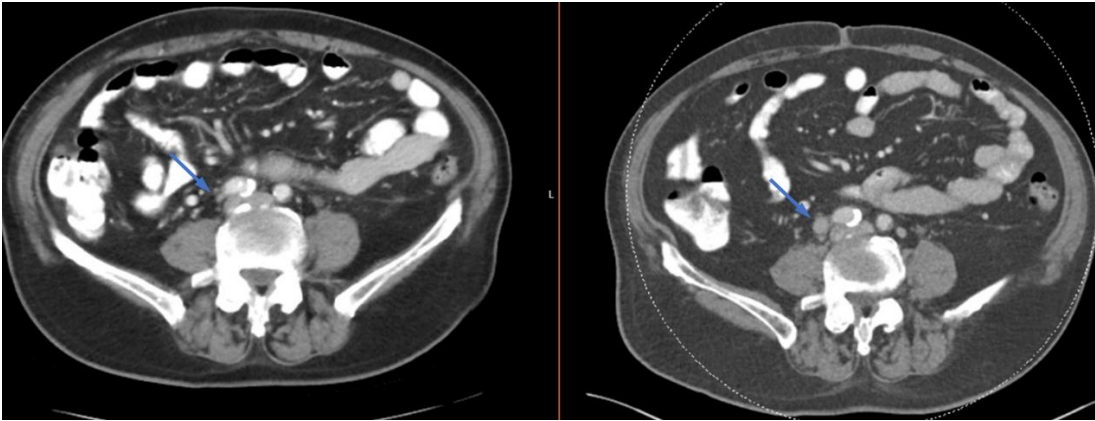

Case 2: Multiple newly FDG positive lymph nodes (blue arrow) noted on PET/CT

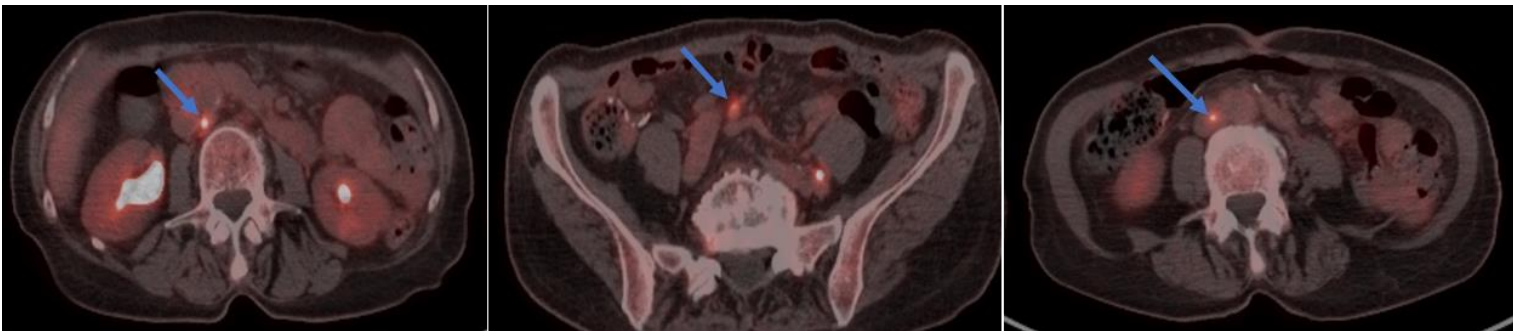

**eTable. Sensitivity, Specificity, PPV, and NPV for ctDNA, Imaging, and CEA Levels**

| Stage       | ctDNA %, (95% CI)    |                      |                      | Imaging %, (95% CI)  |                      |                      | CEA %, (95% CI)    |                     |                      | Imaging or CEA %, (95% CI) |                      |                      |
|-------------|----------------------|----------------------|----------------------|----------------------|----------------------|----------------------|--------------------|---------------------|----------------------|----------------------------|----------------------|----------------------|
|             | II-III               | IV                   | II-IV                | II-III               | IV                   | II-IV                | II-III             | IV                  | II-IV                | II-III                     | IV                   | II-IV                |
| Sensitivity | 66.7,<br>(24.1-94)   | 44.4,<br>(15.3-77.3) | 53.3,<br>(27.4-77.7) | 33.3,<br>(6-75.9)    | 77.8,<br>(40.2-96.1) | 60,<br>(32.9-82.5)   | 33.3,<br>(6-75.9)  | 11.1,<br>(0.6-49.3) | 20.0,<br>(5.3-48.6)  | 66.7,<br>(24.1-94)         | 77.8,<br>(40.2-96.1) | 73.3,<br>(44.8-91.1) |
| Specificity | 100,<br>(83.4-100)   | 100,<br>(59.8, 100)  | 100,<br>(87-100)     | 96,<br>(77.7-99.8)   | 100,<br>(59.8-100)   | 96.9,<br>(82.5-99.8) | 88,<br>(67.7-96.8) | 100,<br>(59.8-100)  | 90.9,<br>(74.5-97.6) | 84,<br>(63.1-94.7)         | 100,<br>(59.8-100)   | 87.9,<br>(70.9-96)   |
| PPV         | 100,<br>(39.6-100)   | 100,<br>(39.6, 100)  | 100,<br>(59.8-100)   | 66.7,<br>(12.5-98.2) | 100,<br>(56.1-100)   | 90,<br>(54.1-99.5)   | 40,<br>(7-83)      | 100,<br>(5.5-100)   | 50,<br>(13.9-86.1)   | 55.6,<br>(17.4-82.6)       | 100,<br>(56.1-100)   | 73.3,<br>(44.8-91.1) |
| NPV         | 92.6,<br>(74.2-98.7) | 61.5,<br>(32.3-84.9) | 82.5,<br>(66.6-92.1) | 85.7,<br>(66.4-95.3) | 80,<br>(44.2-96.5)   | 84.2,<br>(68.1-93.4) | 84.6,<br>(64.3-95) | 50,<br>(25.5-74.5)  | 71.4,<br>(55.2-83.8) | 91.3,<br>(70.5-98.5)       | 80,<br>(44.2-96.5)   | 87.9,<br>(70.9-96)   |
